# Supplementary material
Source: PubMed Central journal article supplement (PMC8711252)

**Figure S1**

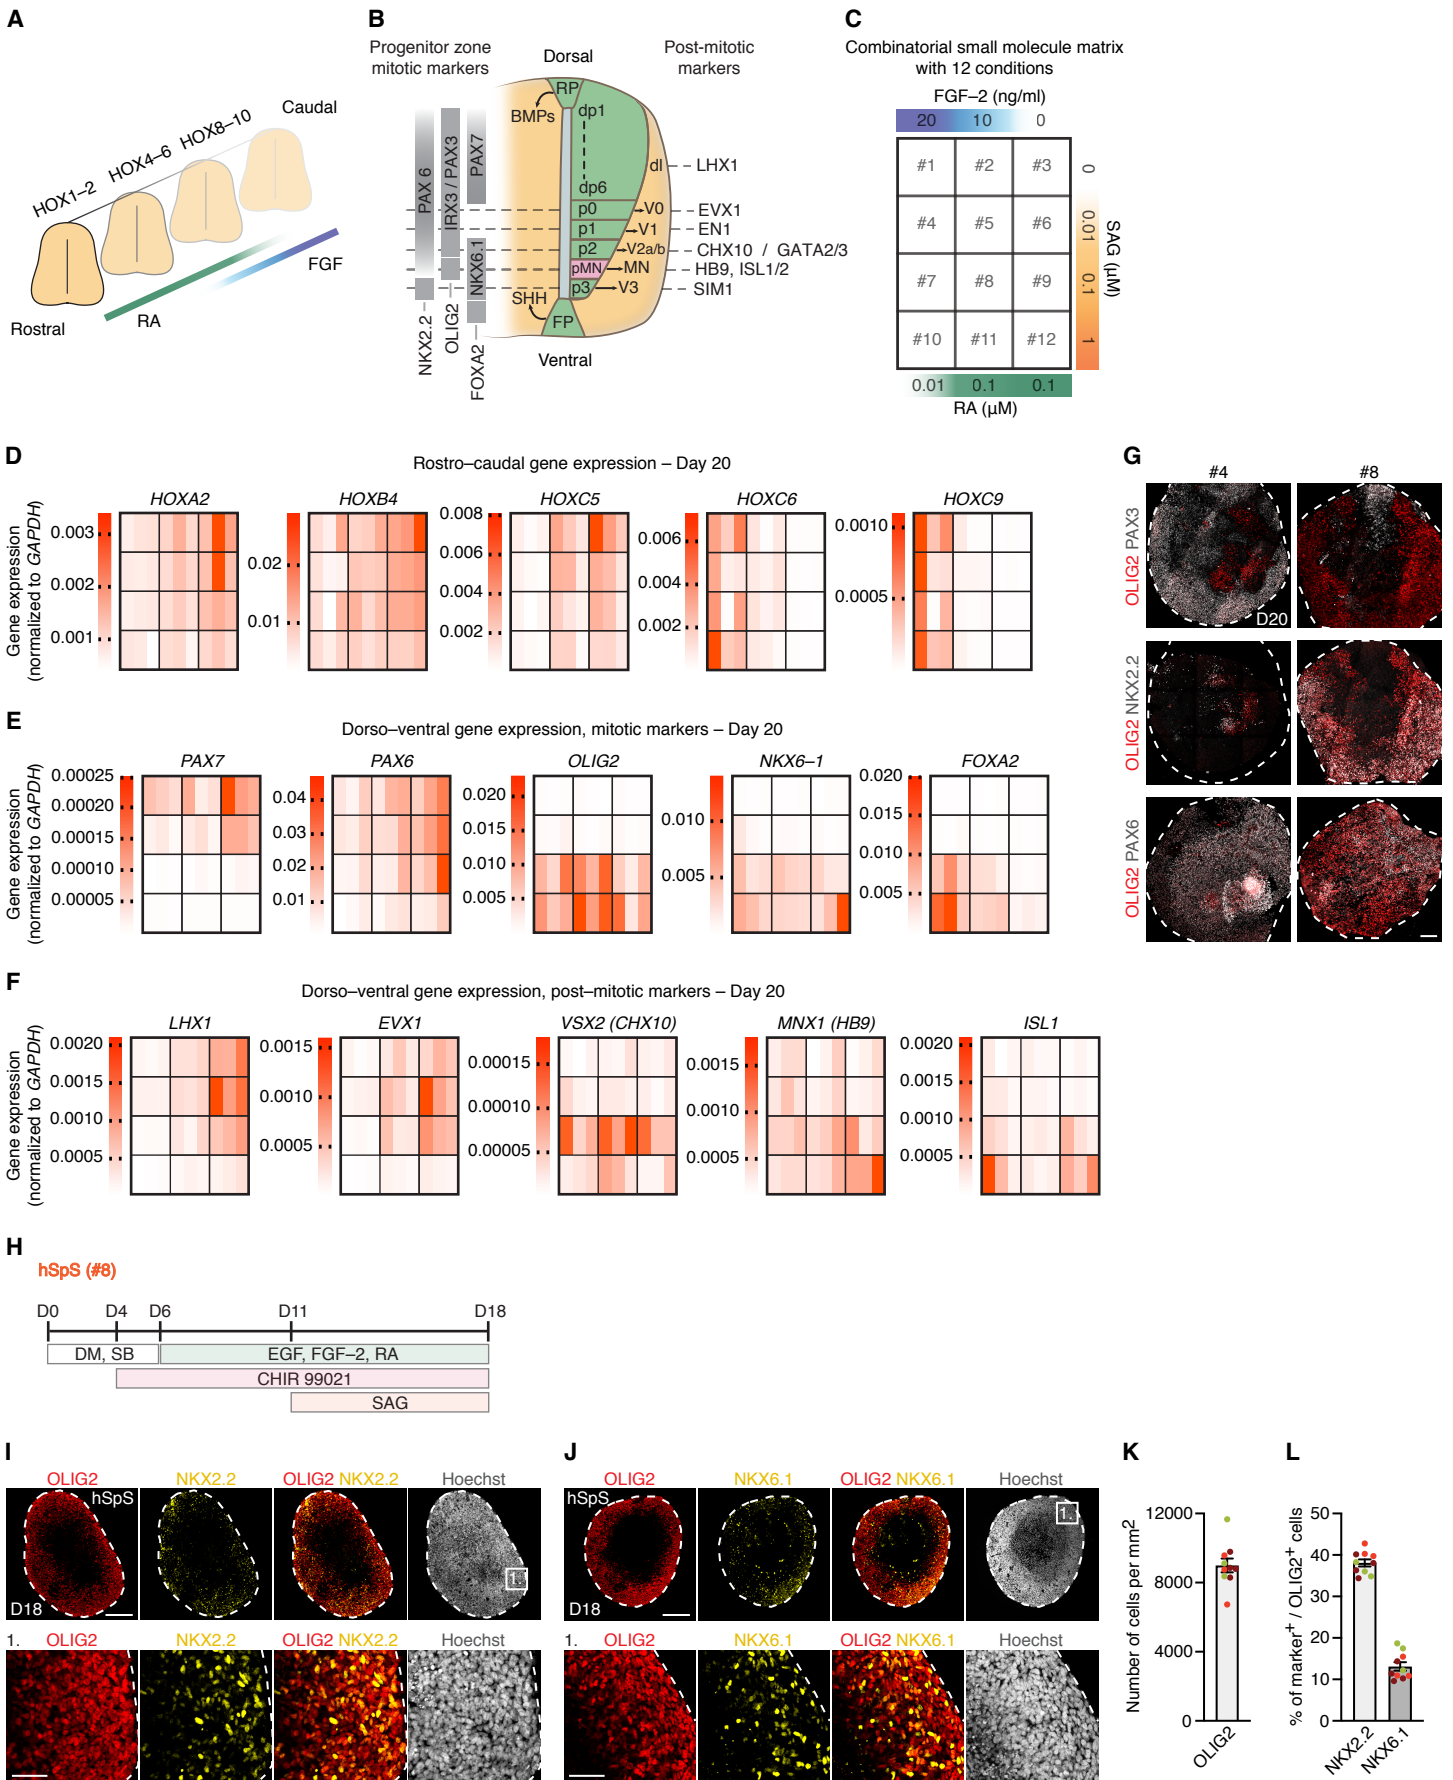

Supplement: NIHMS1649341-supplement-1.pdf [file NIHMS1649341-supplement-1.pdf]

**Figure S3**

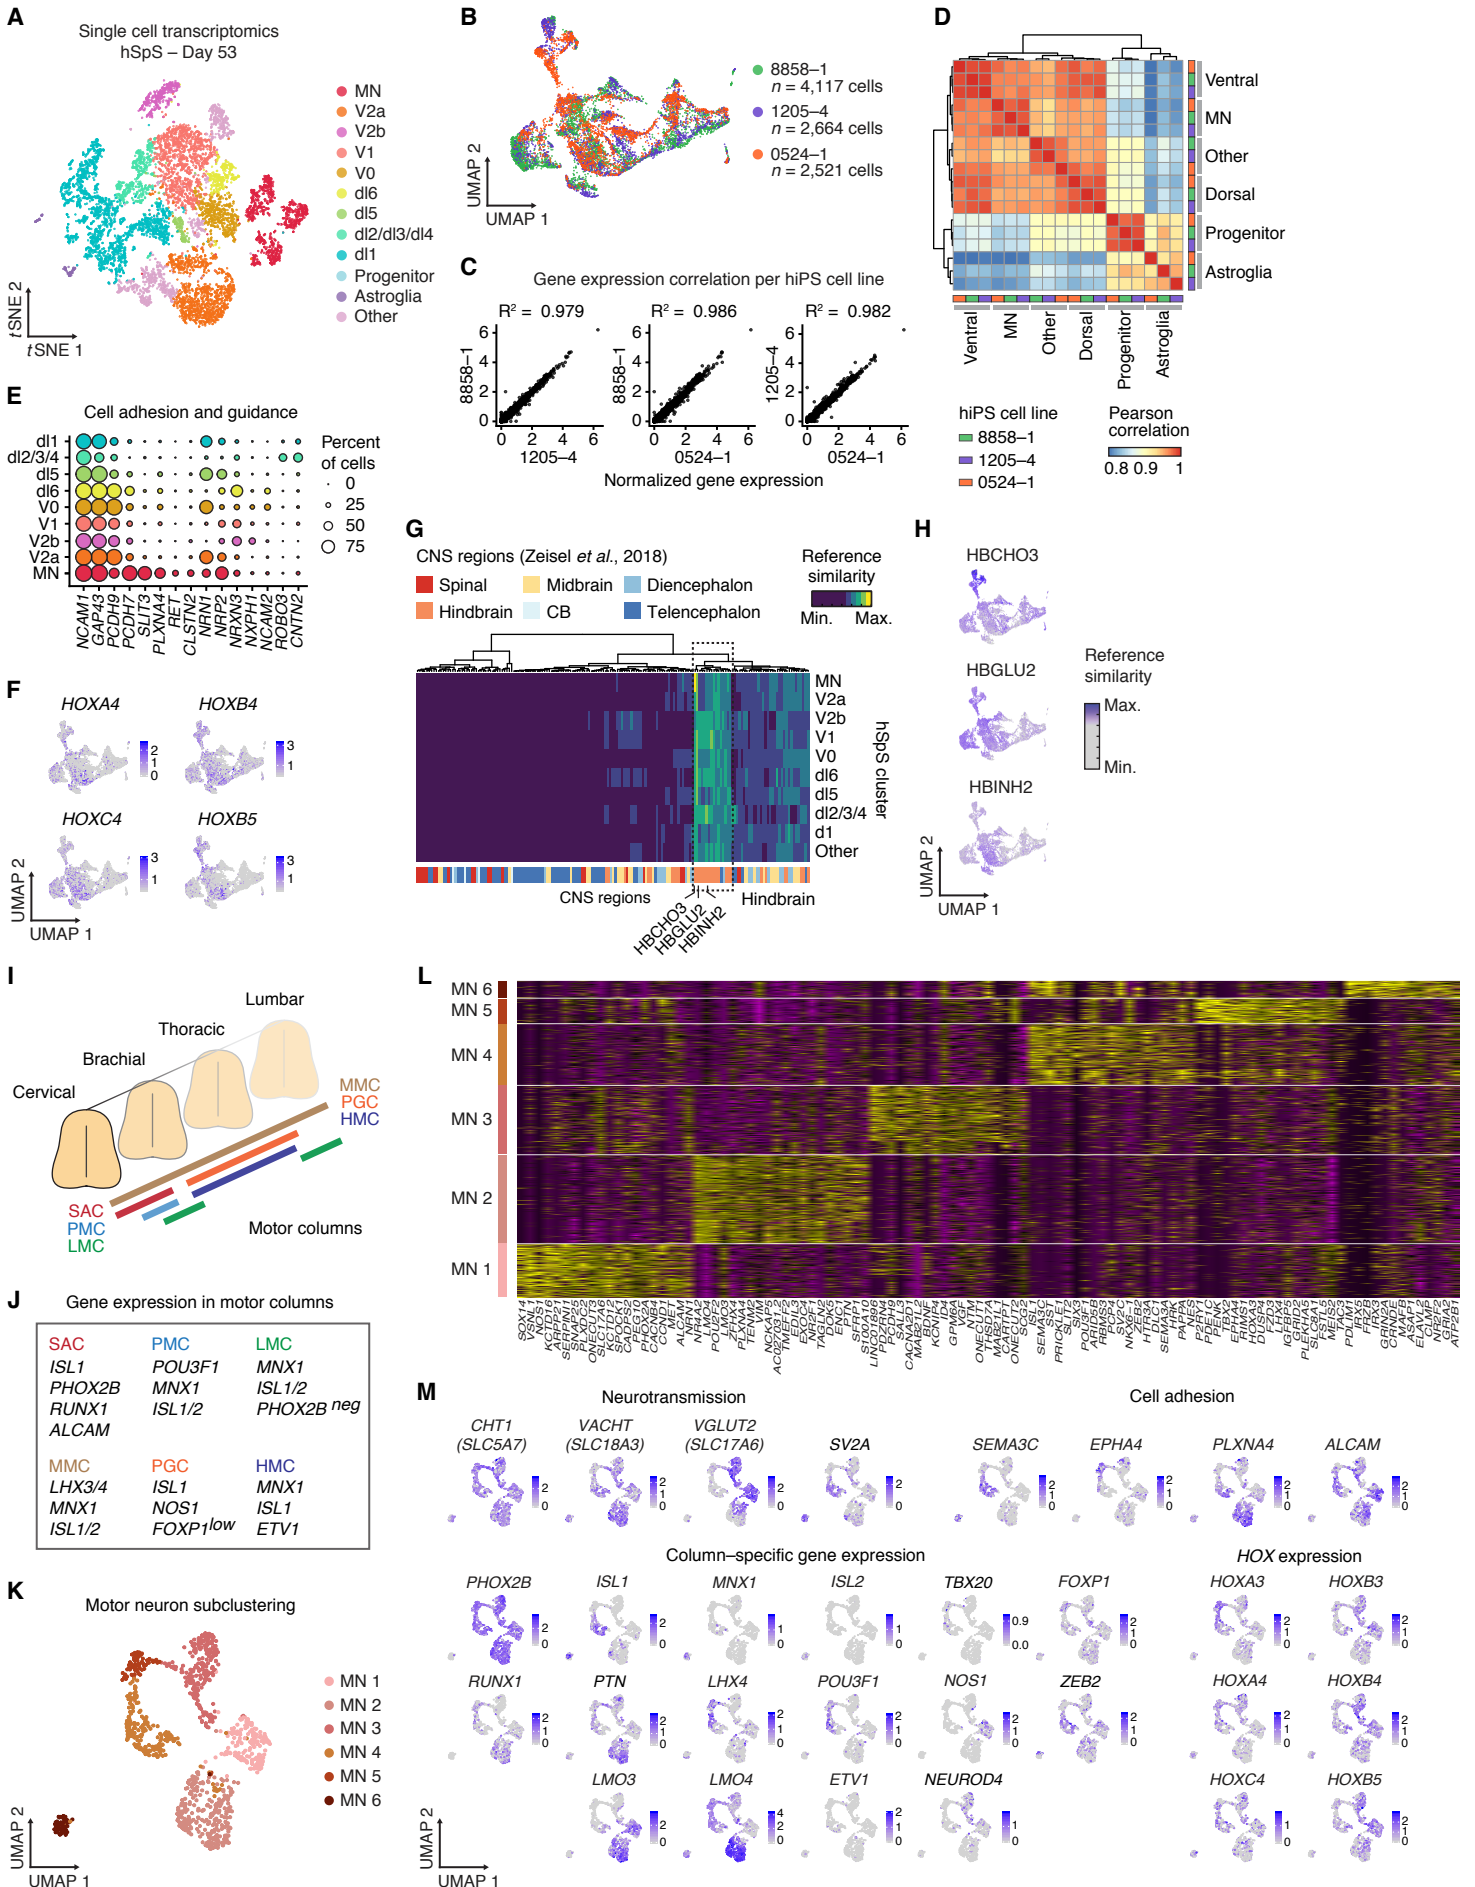

Supplement: NIHMS1649341-supplement-3.pdf [file NIHMS1649341-supplement-3.pdf]

**Figure S4**

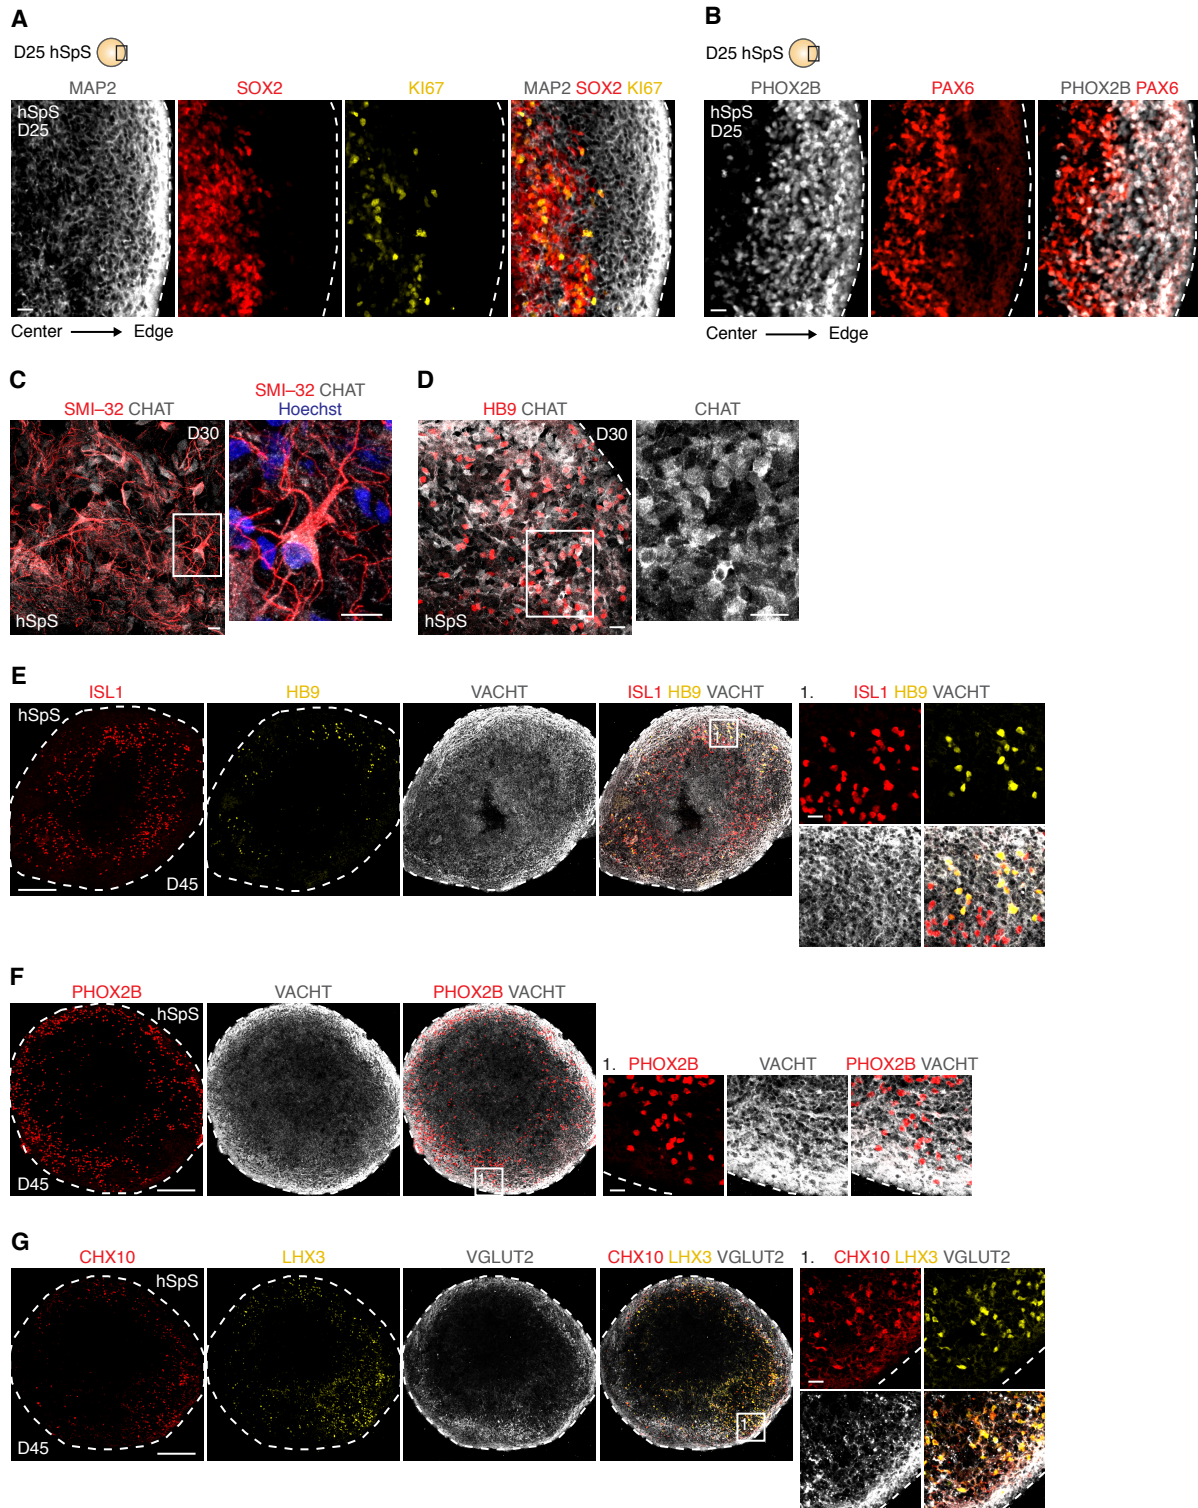

Supplement: NIHMS1649341-supplement-4.pdf [file NIHMS1649341-supplement-4.pdf]

**Figure S7**

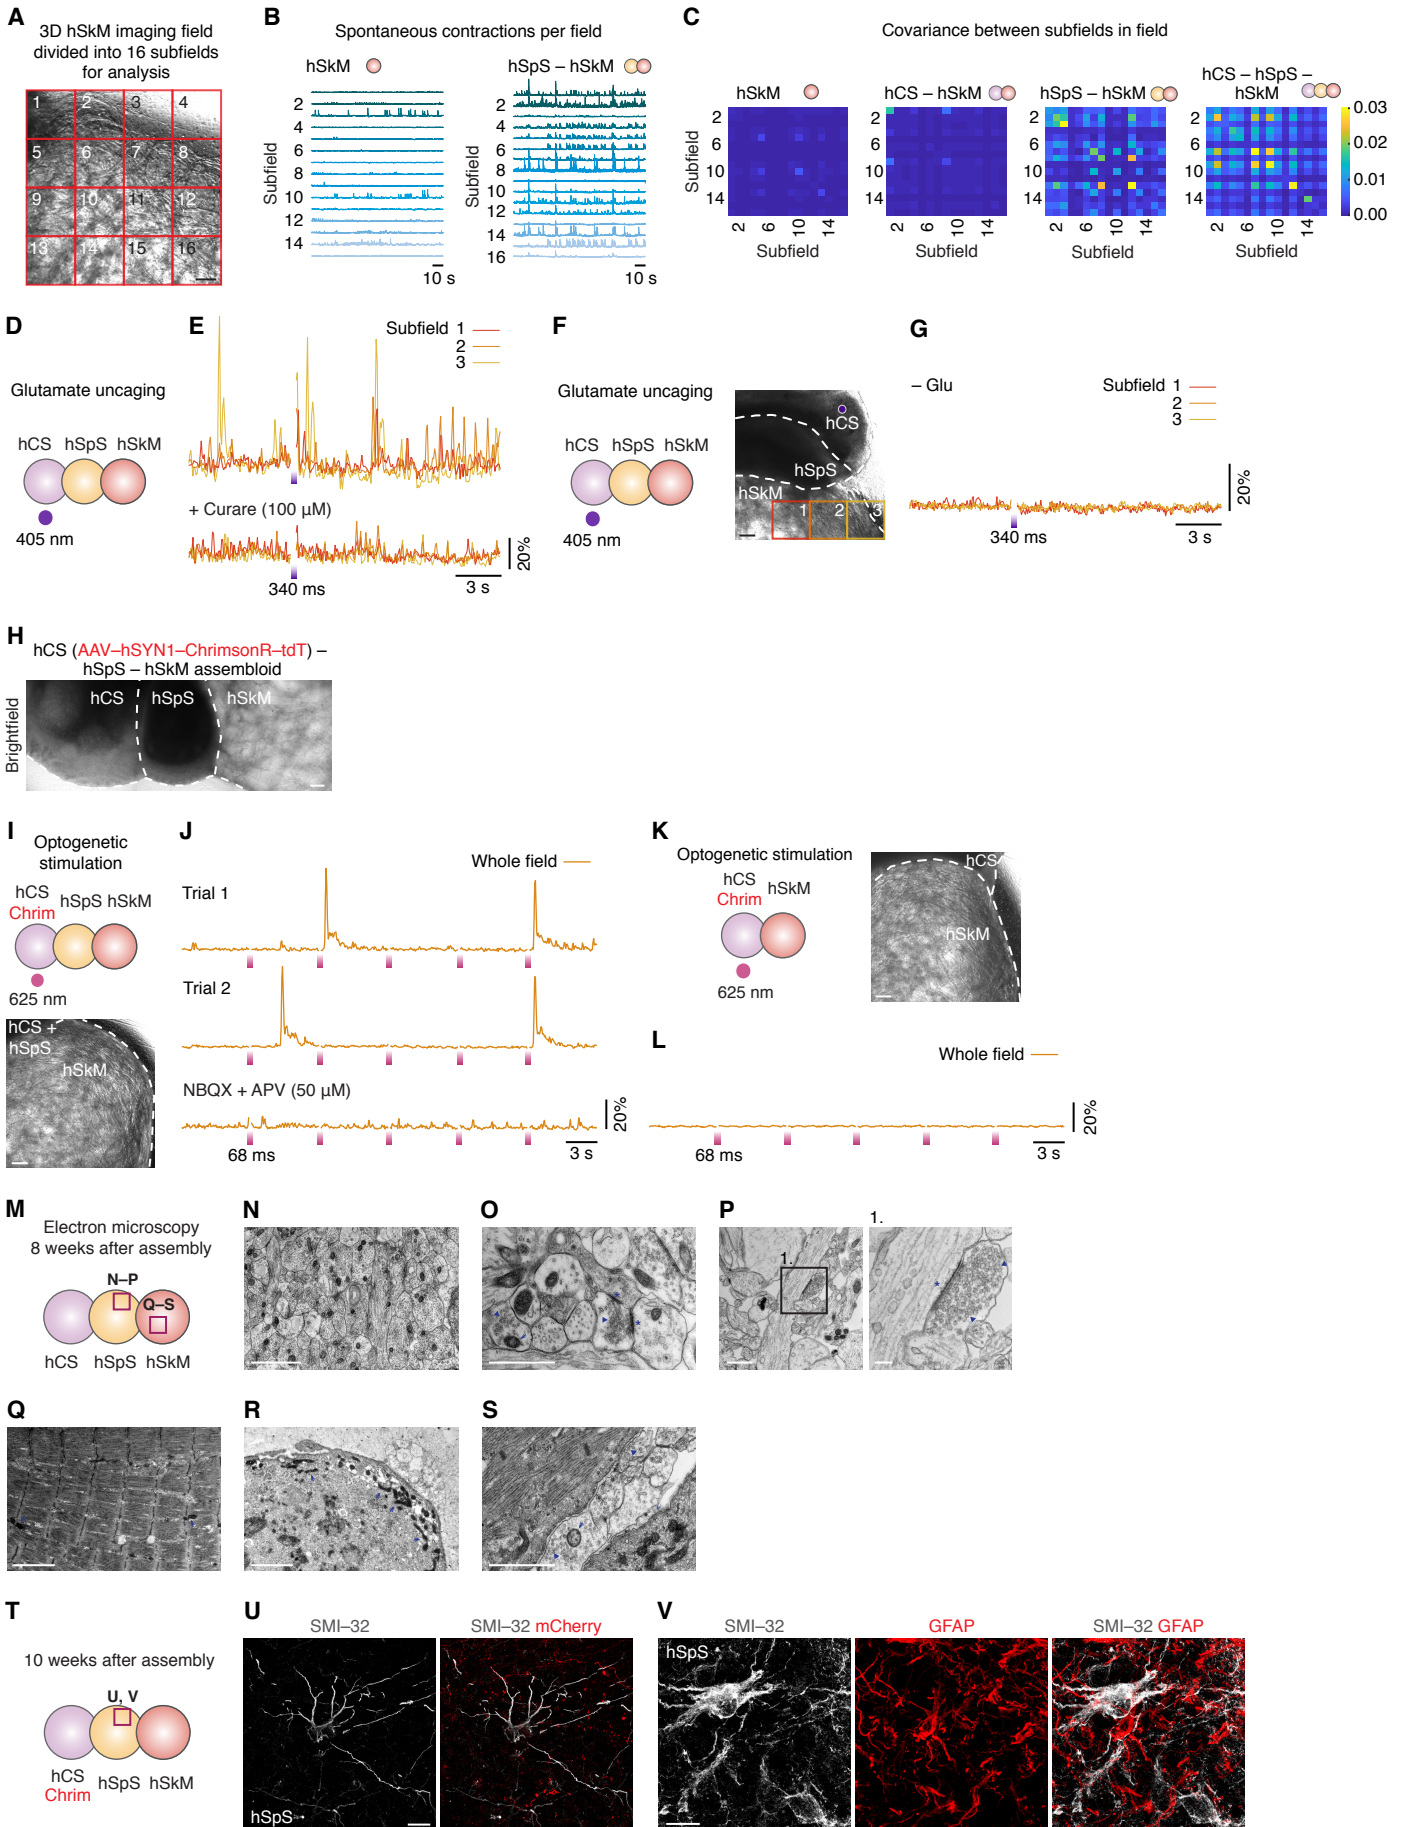

Supplement: NIHMS1649341-supplement-7.pdf [file NIHMS1649341-supplement-7.pdf]

# Figure S8

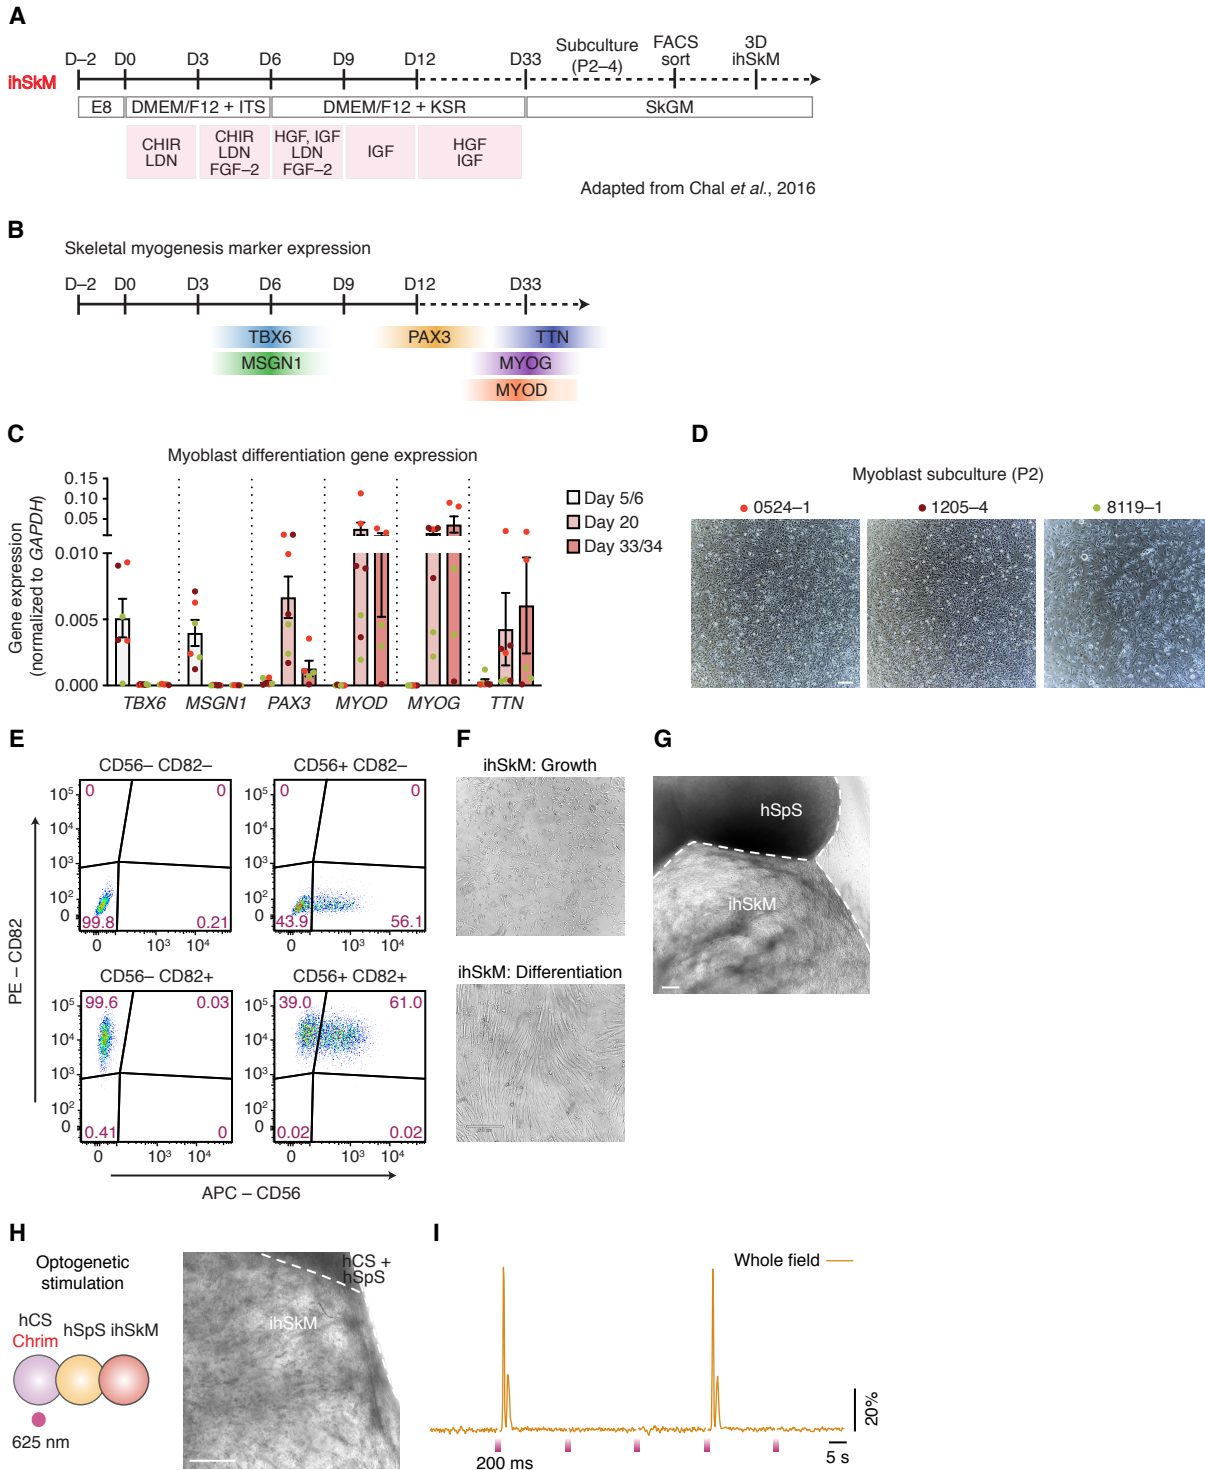

Supplement: NIHMS1649341-supplement-8.pdf [file NIHMS1649341-supplement-8.pdf]
